# Supplementary material for: The stability of perennial grasses mediates the negative impacts of long-term warming and increasing precipitation on community stability in a desert steppe
Source: Frontiers journal article supplement (doi:10.3389/fpls.2023.1235510), 2023-07-27
Supplement: Data_Sheet_1.pdf [file Data_Sheet_1.pdf]

**Table S1.** The physical and chemical properties of the soil (0-30cm) in the study site.

| PH<br>value | Soil<br>conductivity<br>(ms m <sup>-1</sup> ) | Soil organic<br>matter<br>(g kg <sup>-1</sup> ) | Total<br>nitrogen<br>(g kg <sup>-1</sup> ) | Total<br>phosphorus<br>(g kg <sup>-1</sup> ) | Total<br>potassium<br>(g kg <sup>-1</sup> ) | Available<br>nitrogen<br>(mg kg <sup>-1</sup> ) | Available<br>phosphorus<br>(mg kg <sup>-1</sup> ) | Available<br>potassium<br>(mg kg <sup>-1</sup> ) |
|-------------|-----------------------------------------------|-------------------------------------------------|--------------------------------------------|----------------------------------------------|---------------------------------------------|-------------------------------------------------|---------------------------------------------------|--------------------------------------------------|
| 8.31        | 153                                           | 19.27                                           | 1.27                                       | 0.31                                         | 35.45                                       | 74.07                                           | 8.61                                              | 146.27                                           |

**Table S2.** Species composition and division of plant communities in study site. PG is perennial grasses, PF is perennial forbs, SS is semi-shrubs, AH is annual herbs.

| Species name                                  | Functional group | Photosynthesis type |
|-----------------------------------------------|------------------|---------------------|
| <i>Stipa breviflora</i> Griseb.               | PG               | C <sub>3</sub>      |
| <i>Stipa krylovii</i> Roshev.                 | PG               | C <sub>3</sub>      |
| <i>Leymus chinensis</i> (Trin.) Tzvel.        | PG               | C <sub>3</sub>      |
| <i>Cleistogenes songorica</i> (Roshev.) Ohwi. | PG               | C <sub>4</sub>      |
| <i>Allium mongolicum</i> Regel.               | PF               | C <sub>3</sub>      |
| <i>Convolvulus ammannii</i> Desr.             | PF               | C <sub>3</sub>      |
| <i>Potentilla bifurca</i> L.                  | PF               | C <sub>3</sub>      |
| <i>Aster altaicus</i> Willd.                  | PF               | C <sub>3</sub>      |
| <i>Iris tectorum</i> Maxim.                   | PF               | C <sub>3</sub>      |
| <i>Astragalus galactites</i> Pall.            | PF               | C <sub>3</sub>      |
| <i>Melissilus ruthenicus</i> (L.) Peschkova.  | PF               | C <sub>3</sub>      |
| <i>Allium polyrhizum</i> Turcz. ex Regel.     | PF               | C <sub>3</sub>      |
| <i>Artemisia frigida</i> Willd.               | SS               | C <sub>3</sub>      |
| <i>Kochia prostrata</i> (L.) Schrad.          | SS               | C <sub>4</sub>      |
| <i>Caragana microphylla</i> Lam.              | S                | C <sub>3</sub>      |
| <i>Caragana stenophylla</i> Pojark.           | S                | C <sub>3</sub>      |
| <i>Neopallasia pectinata</i> (Palls) Poljak.  | AH               | C <sub>3</sub>      |
| <i>Artemisia scoparia</i> Waldst. et Kit.     | AH               | C <sub>3</sub>      |
| <i>Chenopodium glaucum</i> L.                 | AH               | C <sub>4</sub>      |
| <i>Chenopodium aristatum</i> L.               | AH               | C <sub>4</sub>      |
| <i>Portulaca oleracea</i> L.                  | AH               | C <sub>4</sub>      |
| <i>Salsola collina</i> Pall.                  | AH               | C <sub>4</sub>      |

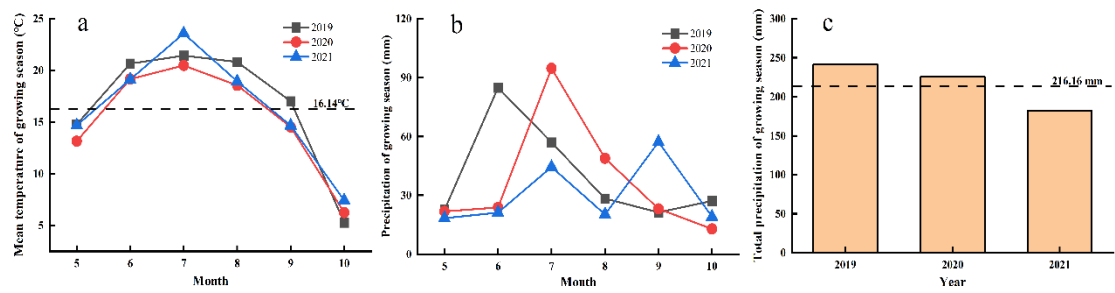

**Figure S1.** Mean temperature and total precipitation of the plant growing season (May to October) during the 2019-2021. The dotted line indicates the mean temperature and precipitation during the growing season of 2019-2021.

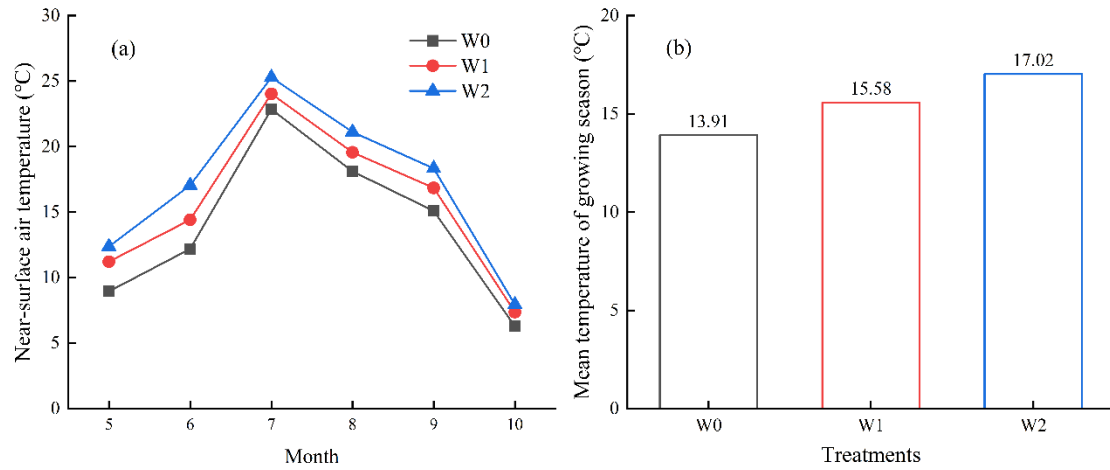

**Figure S2.** Effects of open top chamber (OTC) on near-surface air temperature during the growing season (May to October) in the 2021.

Calculation formulas for relative frequency, relative density, relative height, relative coverage and relative biomass of species:

In all treatments:

relative frequency (Fr) = Frequency of a species / Sum of frequency of all species

(Eq. 1)

In a treatment:

relative density (Dr) = Density of a species / Sum of density of all species

(Eq. 2)

relative height (Hr) = The average height of a species / The sum of the average heights of all species

(Eq. 3)

relative coverage (Cr) = Coverage of a species / Sum of coverage of all species

(Eq. 4)

relative biomass (Br) = Biomass of a species / Sum of biomass of all species

(Eq. 5)
